# Supplementary material
Source: publisher figshare collection journal article supplement (https://tandf.figshare.com/ndownloader/files/14399585)

**Supplementary figure. 1. Cellular uptake of Lac-PAMAEMA/miR-146b mimic complex by HepG2 and AML12 cells. (A)** representative agarose gel electrophoresis image illustrating miR-146b loading efficiency at ratios from 5:1 to 200:1 (w/w). **(B)** Cells were treated with 100 nM Lac-PAMAEMA/Cy3-miR-146b mimic or Lipofectamine /miR-146b mimic for 4 h, andmiR-146b mimic uptake were detected by FACS.


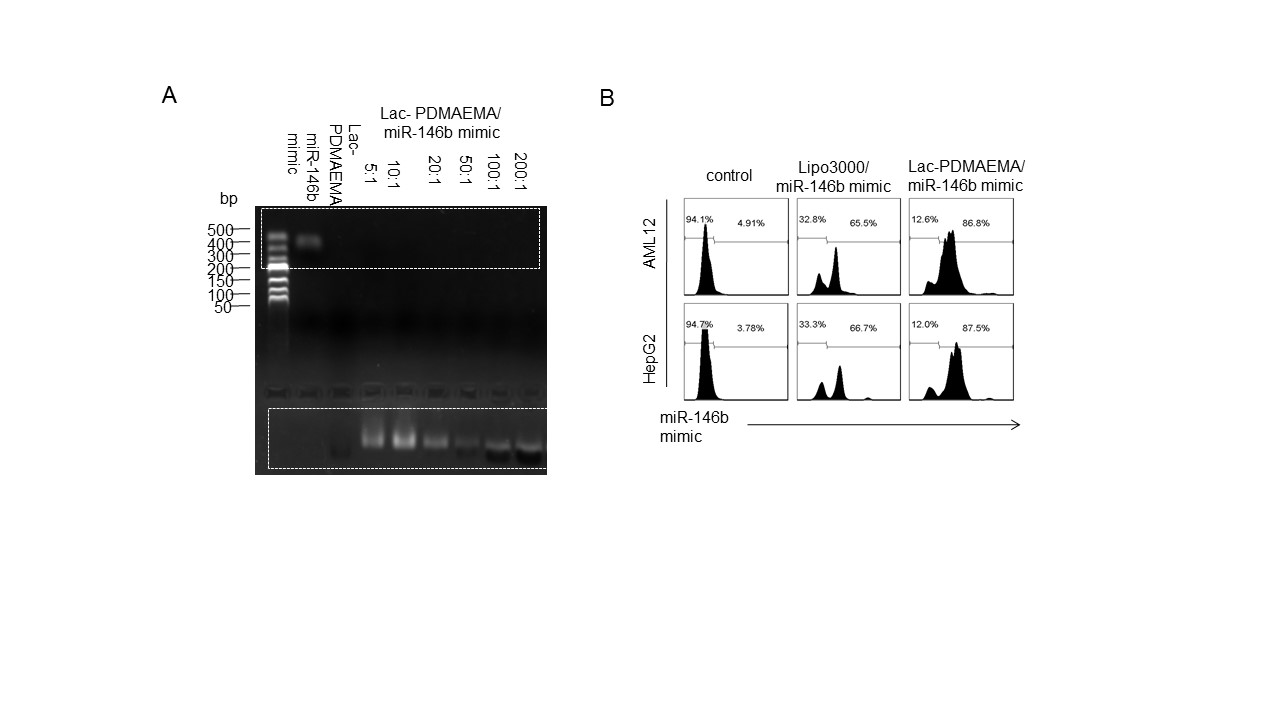

Supplement: Supplementary file 1 [file 14399585]
